# Supplementary material
Source: PubMed Central journal article supplement (PMC6662734)
Supplement: NIHMS1535544-supplement-Major_Resources_Table.pdf [file NIHMS1535544-supplement-Major_Resources_Table.pdf]

## Major Resources Tables

### Animals

| Species/Strain  | Vendor or Source    | Background Strain | Sex  |
|-----------------|---------------------|-------------------|------|
| Mouse, Wildtype | Jackson Laboratory  | C57BL/6J          | Male |
| Mouse, CSE -/-  | C. Kevil Laboratory | C57BL/6J          | Male |

### Antibodies

| Target antigen                               | Vendor or Source                  | Catalog #   | Working concentration                        |
|----------------------------------------------|-----------------------------------|-------------|----------------------------------------------|
| Phospho-NF- $\kappa$ B (Ser536, p65 subunit) | Cell Signaling Technology         | #3033       | 1:1000 (WB)                                  |
| NF- $\kappa$ B (p65 subunit)                 | Cell Signaling Technology         | #4764       | 1:1000 (WB)                                  |
| NF- $\kappa$ B (p65 subunit)                 | Santa Cruz                        | Sc-109      | 0.1 $\mu$ g/ml (WB)<br>1 $\mu$ g/ml (ICC)    |
| Phospho-ERK1/2 (Thr202/Tyr204)               | Cell Signaling Technology         | #4370       | 1:1000 (WB)                                  |
| ERK1/2                                       | Santa Cruz                        | Sc-94       | 0.1 $\mu$ g/ml (WB)                          |
| Phospho-eNOS (Ser1177)                       | Cell Signaling Technology         | #9571       | 1:1000 (WB)                                  |
| CSE                                          | Proteintech                       | #12217-1-AP | 0.35 $\mu$ g/ml (WB)<br>1.7 $\mu$ g/ml (IHC) |
| CBS                                          | Abcam                             | Ab135626    | 1 $\mu$ g/ml (WB)                            |
| ICAM-1                                       | Santa Cruz                        | Sc-1511     | 0.2 $\mu$ g/ml (WB)                          |
| VCAM-1                                       | Abcam                             | Ab134047    | 0.44 $\mu$ g/ml (WB)                         |
| GAPDH                                        | Cell Signaling Technology         | #2118       | 1:25000 (WB)                                 |
| $\beta$ -actin                               | Sigma                             | A2228       | 0.1 $\mu$ g/ml (WB)                          |
| $\beta$ -tubulin                             | Cell Signaling Technology         | #2128       | 1:000 (WB)                                   |
| von Willibrand Factor                        | Abcam                             | Ab11713     | 10 $\mu$ g/mL (IHC)                          |
| CD31                                         | Santa Cruz                        | Sc-1506     | 4 $\mu$ g/mL (IHC)                           |
| Mac2                                         | Accurate Chemical                 | CL8942AP    | 0.1 $\mu$ g/mL (IHC)                         |
| Smooth Muscle Actin                          | Sigma Aldrich                     | C6198       | 2.5 $\mu$ g/ml (IHC)                         |
| Rabbit IgG                                   | Life Technologies (Thermo Fisher) | 3900        | 1 $\mu$ g/ml (IHC)                           |

### Cultured Cells

| Name                                        | Vendor or Source                         | Sex (F, M, or unknown) |
|---------------------------------------------|------------------------------------------|------------------------|
| Human Aortic Endothelial Cells              | Lonza                                    | Male                   |
| Wildtype Mouse Aortic Endothelial Cells     | C57Bl/6J, Jackson Labs                   | Unknown                |
| CSE knockout Mouse Aortic Endothelial Cells | CSE <sup>-/-</sup> , C. Kevil Laboratory | Unknown                |

**qRT-PCR Primers**

| Gene                     | Species | Forward                | Reverse                |
|--------------------------|---------|------------------------|------------------------|
| $\beta$ 2- microglobulin | Mouse   | TTCTGGTGCTTGTCTCACTGA  | CAGTATGTTTCGGCTTCCCATT |
| Rpl13a                   | Mouse   | ATGACAAGAAAAAGCGGATG   | CTTTTCTGCCTGTTTCCGTA   |
| ICAM-1                   | Mouse   | GTGATGCTCAGGTATCCATCCA | CACAGTTCTCAAAGCACAGCG  |
| VCAM-1                   | Mouse   | TCAAAGAAAGGGAGACTG     | GCTGGAGAACTTCATTATC    |
