# Supplementary material
Source: PubMed Central journal article supplement (PMC6662734)

**Graphical Abstract**

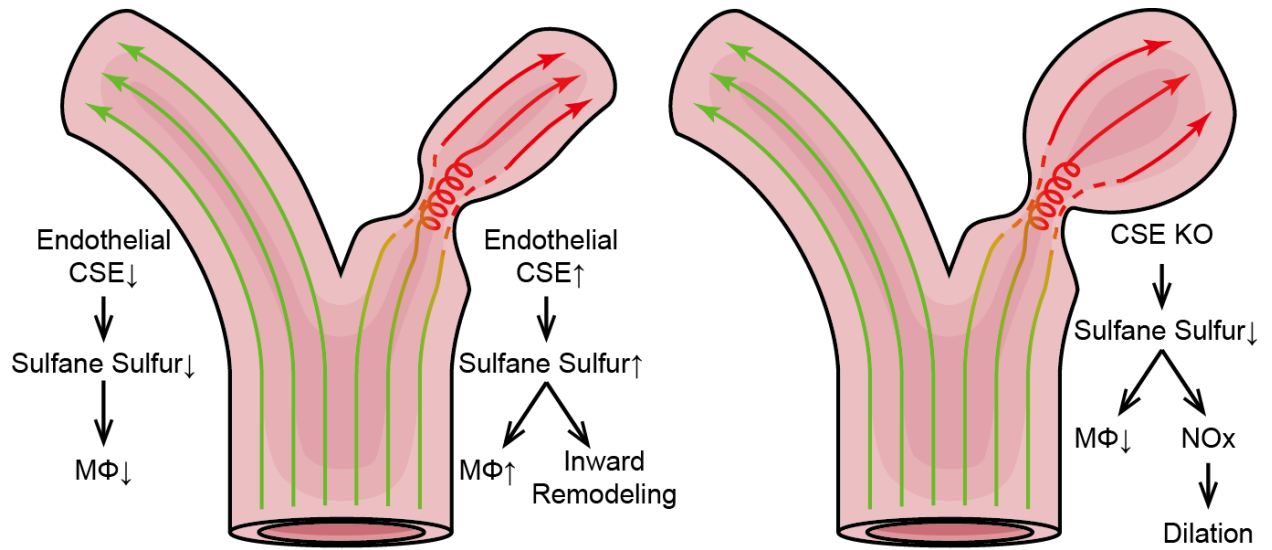

Supplement: NIHMS1535544-supplement-Graphical_Abstract.pdf [file NIHMS1535544-supplement-Graphical_Abstract.pdf]
